# Supplementary material for: Predicting The Sign of Trophic Effects: Individual-Based Simulation Versus Loop Analysis
Source: Research Square preprint supplement (doi:10.21203/rs.3.rs-524228/v1), 2021-05-20
Supplement: Supplementary file 1 [file 1ae6f642e6cde412b1a8b0aa.xlsx]

## Sheet: Munka1
		LApred	LAadj	aij
all	aij		0.007
	TIij		0.074	0.032
	TIi	0.006
site 1	aij		0.027
	TIij		0.067	0.048
	TIi	0.008
site 2	aij		0.06
	TIij		0.074	0.073
	TIi	0.106
site 3	aij		0.028
	TIij		0.125	0.03
	TIi	0.072
site 4	aij		0.166
	TIij		0.083	0.139
	TIi	0.065
site 5	aij		0.069
	TIij		0.092	0.033
	TIi	0.265
site 6	aij		0.089
	TIij		0.062	0.113
	TIi	0.209
